# Supplementary material
Source: PubMed Central journal article supplement (PMC6989701)
Supplement: 13280_2019_1191_MOESM2_ESM.pdf [file 13280_2019_1191_MOESM2_ESM.pdf]

***Ambio***

Electronic Supplementary Material

*This supplementary material has not been peer reviewed*

Title: **Circumpolar status of arctic ptarmigan: Population dynamics and trends**

Authors: Eva Fuglei, John-Andre´ Henden, Chris Callahan, Olivier Gilg, Jannik Hansen, Rolf A. Ims, Arkady P. Isaev, Johannes Lang, Carol McIntyre, Richard R. Merizon, Oleg Y. Mineev, Yuri N. Mineev, Dave Mossop, Olafur K. Nielsen, Erlend B. Nilsen, Åshild Ø. Pedersen, Niels Martin Schmidt, Benoît Sittler, Maria Hørnell Willebrand, Kathy Martin.

**Table S1.** Characteristics of all the circumpolar ptarmigan study sites and monitoring series, both those included (no color) and those not included (grey color) in the analyses. The ID numbers (#) are located on the map in Figure 1. WPt = Willow ptarmigan, RPt = Rock ptarmigan, ERPt=Evermanns rock ptarmigan, - = information is not available. Sub = sub Arctic, low = low Arctic, high = high Arctic. Monitoring methods are recorded as 1 to 4 methods described in Materials and methods.

| #     | Site name                   | Country   | Coordinates            | Species | Arctic | Study area (km <sup>2</sup> ) | Duration of time series years | Field season        | Person days/year in the field | Monitoring methods | Reference/source                                     |
|-------|-----------------------------|-----------|------------------------|---------|--------|-------------------------------|-------------------------------|---------------------|-------------------------------|--------------------|------------------------------------------------------|
| 1-24  | Northern Sweden 24 sites    | Sweden    | 65,52616N<br>16,07494E | WPt     | sub    | 70 000                        | 1994-                         | 1-20 Aug            | 700                           | 1                  | Höglund et al. 1967                                  |
| 25    | Troms                       | Norway    | 69,86516N<br>21,69176E | WPt     | sub    | -                             | 2007-                         | 1-20 Aug            | 20-60                         | 1                  | data and metadata available from Nilsen et al. 2018a |
| 26    | Finnmark Varanger Peninsula | Norway    | 70,2457N<br>30,5340E   | WPt     | low    | -                             | 2005-                         | 1-4 Jul<br>1-4 Sept | 9                             | 4                  | Henden et al. 2011                                   |
| 27    | East Finnmark               | Norway    | 70,07348N<br>28,1856E  | WPt     | sub    | -                             | 2000-                         | 1-20 Aug            | -                             | 1                  | data and metadata available from Nilsen et al. 2018b |
| 28    | Interior Finnmark           | Norway    | 69,0124N<br>23,0410E   | WPt     | sub    | -                             | 2000-                         | 1-20 Aug            | -                             | 1                  | data and metadata available from Nilsen et al. 2018b |
| 29    | West Finnmark               | Norway    | 69,9689N<br>23,2716E   | WPt     | sub    | -                             | 2000-                         | 1-20 Aug            | -                             | 1                  | data and metadata available from Nilsen et al. 2018b |
| 30    | Svalbard                    | Norway    | 78,91962N<br>11,85989E | RPt     | high   | -                             | 1981-1982                     | -                   | -                             | 2                  | Unander & Steen 1985                                 |
| 31    | Svalbard                    | Norway    | 78,25N<br>17,33333E    | RPt     | high   | 1000                          | 2000-                         | 1 Apr-<br>5 May     | 130                           | 1                  | Soininen et al. 2016                                 |
| 32-53 | Iceland 22 sites            | Iceland   | 65,25343N<br>18,8726W  | RPt     | sub    | 93.1                          | 1963-                         | spring              | 3                             | 1; 2               | Nielsen et al. 2004                                  |
| 54    | Zackenbergl, NorthEast      | Greenland | 74,46666N<br>20,56666W | RPt     | high   | 15.8                          | 1996-                         | 15 May-<br>1 Oct    | 330                           | 2                  | Meltofte et al. 2007                                 |
| 55    | Sirius, NorthEast           | Greenland | 71-78N<br>20W          | RPt     | high   | -                             | 1977-1990-                    | 1 Oct-<br>31 May    | 1400                          | 3                  | Hansen et al. 2008                                   |
| 56    | Karupelv, NorthEast         | Greenland | 72,5N<br>24W           | RPt     | high   | 15                            | 1988-                         | 25 June-<br>5 Aug   | 240                           | 2                  | Meltofte et al. 2007                                 |

|    |                                                         |           |                        |        |      |         |                        |                        |     |   |                                               |
|----|---------------------------------------------------------|-----------|------------------------|--------|------|---------|------------------------|------------------------|-----|---|-----------------------------------------------|
| 57 | Hochstetter<br>, North East                             | Greenland | 75.15N,<br>19.70W      | RPt    | high | 18      | 2010-                  | 30 June – 10<br>August | 250 | 2 | O. Gilg, pers. comm                           |
| 58 | Yukon<br>North Slope                                    | Canada    | 69,5N<br>139,25W       | WPt    | low  | 50      | 1974-not<br>annually   | 20 June-10 July        | 15  | 2 | D. Mossop, pers. comm                         |
| 59 | Yukon,<br>Ogilvie<br>mountains                          | Canada    | 64,25N<br>138,5833W    | WPt    | Sub  | 2       | 1970-                  | 1-10 May               | 6   | 2 | D. Mossop, pers. comm                         |
| 60 | Nadahini,<br>Chilkat<br>Pass, N.<br>British<br>Columbia | Canada    | 59,7N<br>136,6666W     | WPt    | low  | 2       | 1957-                  | 3-10 May               | 5   | 2 | D. Mossop, pers. comm                         |
| 61 | Tungsten,<br>McKenzie<br>mountains,<br>Yukon            | Canada    | 62N<br>128,5W          | WPt    | sub  | 2       | 1982-1985              | 1-10 May               | 6   | 2 | D. Mossop, pers. comm                         |
| 62 | Manitoba                                                | Canada    | 58,4N<br>94,4W         | WPt    | sub  | 10      | 1981-84, 85            | Mid Apr-mid<br>Aug     | 250 | 2 | Sandercock et al. 2005                        |
| 63 | Ruby<br>Mountains<br>Kluane, SW<br>Yukon                | Canada    | 61,21666N<br>138,2666W | WPtRPt | sub  | 10      | 1988-1996<br>2004-2007 | 1 May-<br>20 July      | 160 | 2 | Martin et al. 2001; Wilson<br>and Martin 2012 |
| 64 | Chilkat<br>Pass, NW<br>British<br>Columbia              | Canada    | 59,83333N<br>136,5W    | WPt    | sub  | 2.5-4.5 | 1979-1981<br>1984-1992 | Mid Apr-mid<br>Aug     | 360 | 2 | Sandercock et al. 2005                        |
| 65 | Anderson<br>river,<br>Northwest<br>Territories          | Canada    | 69,7N<br>129W          | WPt    | low  | 646     | 1958-1985              | Jun                    | -   | 2 | Hannon & Barry 1986                           |
| 66 | Windy Lake,<br>Northwest<br>Territory                   | Canada    | 68,08333N<br>106,6666W | RPt    | low  | -       | 1987-1989              | Early Jun              | -   | 2 | Cotter et al. 1992                            |
| 67 | Fair Haven,<br>Newfoundl<br>and                         | Canada    | 47,5N<br>53,85W        | WPt    | sub  | 20      | 1999-2012              | May-Apr                | 10  | 1 | C. Callahan, pers. comm                       |
| 68 | Gaff<br>Topsails,<br>Newfoundl<br>and                   | Canada    | 49,11666N<br>56,7W     | WPt    | sub  | 40      | 1999-2012              | May-Apr                | 10  | 1 | C. Callahan, pers. comm                       |

|    |                                |        |                          |          |     |                   |           |              |          |   |                                               |
|----|--------------------------------|--------|--------------------------|----------|-----|-------------------|-----------|--------------|----------|---|-----------------------------------------------|
| 69 | Lapoile, Newfoundland          | Canada | 47,85N<br>58,7W          | WPtRpt   | sub | 40                | 1999-2012 | May-Apr      | 10       | 1 | C. Callahan, pers. comm                       |
| 70 | Avalon Peninsula, Newfoundland | Canada | 47.015871N<br>53.261641W | WPt      | low | -                 | 1955-1965 | spring       | -        | 2 | Bergerud 1970                                 |
| 71 | Alaska-Eagle Summit            | USA    | 65,5175N<br>145,3068W    | Rpt      | low | -                 | 2014-     | Apr-Aug      | 200      | 3 | R. Merizon, pers. comm                        |
| 72 | Alaska-Alaska Range            | USA    | 63,0365N<br>147,3075W    | WPtRpt   | low | -                 | 1997-     | Apr-Aug      | 200      | 3 | R. Merizon, pers. comm                        |
| 73 | Alaska-Southcentral Metro      | USA    | 61,1747N<br>149,6554W    | WPtRpt   | sub | -                 | 2008-     | Apr-May      | 50       | 3 | R. Merizon, pers. comm                        |
| 74 | Alaska-Kenai Peninsula         | USA    | 60,5868N<br>149,6485W    | WPtRpt   | sub | -                 | 2012-     | Apr-Aug      | 50       | 3 | R. Merizon, pers. comm                        |
| 75 | Alaska-Taylor Highway          | USA    | 63,5403N<br>142,352W     | WPtRpt   | low | -                 | 2014-     | Apr-May      | 10       | 3 | R. Merizon, pers. comm                        |
| 76 | Alaska-Seward Peninsula        | USA    | 64,6474N<br>165,3604W    | WPtRpt   | low | -                 | 2018-     | Apr-May      | 15       | 3 | R. Merizon, pers. comm                        |
| 77 | Alaska, Denali                 | USA    | 63,58333N<br>149,6333W   | WPt      | sub | 2522              | 1988-     | 1 Apr-30 Jun | 30 to 60 | 3 | C. McIntyre, pers. comm; McIntyre et al. 2012 |
| 78 | Alaska                         | USA    | 69,26666N<br>144,9W      | WPtRpt   | low | 21 230            | 2011-2012 | 12 Mar-6 May | 12       | 3 | Christie et al. 2014                          |
| 79 | Attu Island, Aleutian          | USA    | 52,83333N<br>173,18333E  | Rpt ERpt | low | 12.0-15.5         | 2003-2009 | L May-E June | 5-10     | 2 | Braun et al. 2014                             |
| 80 | Adak Island                    | USA    | 51,75N<br>176,6166E      | Rpt      | low | 4 routes, 31.2 km | 2015-2017 | L May-E June | 5-10     | 3 | S. Ebbert, pers. comm                         |
| 81 | Central Verkhoyansky           | Russia | 67,31666N<br>123,31666E  | WPt      | low | -                 | 1986-2012 | Feb-May      | 10-20    | 3 | Isael 2016, A.P. Isaev, pers. comm            |
| 82 | Lower Lena River               | Russia | 67,63333N<br>135,56666E  | WPt      | sub | -                 | 1986-2012 | Apr-May      | 30       | 3 | A.P. Isaev, pers. comm                        |

|    |                                           |        |                        |     |     |                |                 |                |                           |   |                                                                         |
|----|-------------------------------------------|--------|------------------------|-----|-----|----------------|-----------------|----------------|---------------------------|---|-------------------------------------------------------------------------|
| 83 | Nenetsky                                  | Russia | 68,31666N<br>53,2E     | WPt | low | 150 (36 plots) | 2007-2011       | -              | 120 (2 counting sessions) | 4 | I. Prokovsky, pers. comm                                                |
| 84 | Kanin                                     | Russia | 68,16666N<br>44,4E     | WPt | low | 400 (74 plots) | 2011            | -              | 150 (1 counting session)  | 4 | I. Prokovsky, pers. comm                                                |
| 85 | Kolguev                                   | Russia | 69,08333N<br>48,75E    | WPt | low | 400 (48 plots) | 2013, 2015-2016 | -              | 120 (1 counting session)  | 4 | I. Prokovsky, pers. comm                                                |
| 86 | Vaigach                                   | Russia | 69,73333N<br>60,16666E | WPt | low | 85 (15 plots)  | 2015            | -              | 60 (1 counting session)   | 4 | I. Prokovsky, pers. comm                                                |
| 87 | Erkuta, Yamal                             | Russia | 68,25N<br>69,2E        | WPt | low | -              | 2007-           | 15 Jun-12 Aug  | 6                         | 4 | Ehrich et al. 2017                                                      |
| 88 | Sabetta, Yamal                            | Russia | 71,2N<br>71,6E         | WPt | low | -              | 2014-           | 15 Jun-15 Jul  | 3                         | 4 | D. Ehrich & A.A. Sokolov, pers. comm.                                   |
| 89 | Nenets autonomous district, Komi Republic | Russia | 67,83333N<br>51E       | WPt | low | - (26 plots)   | 1973-2014       | spring         | -                         | 3 | Mineev & Mineev 2017, Kishchinskiy 1973, Sdobnikov 1938, Uspenskiy 1960 |
| 90 | Lower Kolyma                              | Russia | 69,05N<br>161,5E       | WPt | low | -              | 1977-1987       | Summer, autumn | -                         | 3 | Andreev 1988                                                            |
|    |                                           |        |                        |     |     |                |                 |                |                           |   |                                                                         |

### References for Suppl. Table X2.

Andreev, A. 1988. The ten year cycle of the willow grouse of Lower Kolyma. *Oecologia* 76: 261-267.

Braun, C.E., Taylor, W.P., Ebbert, S.E. 2014. Changes in Evermanns Rock Ptarmigan density on an eastern portion of Attu Island, Alaska, 2003-2009. *Northwestern Naturalist* 95: 28-34.

Bergerud, A.T. 1970. Population dynamics of the willow ptarmigan *Lagopus lagopus alleni* L. in Newfoundland 1955 to 1965. *Oikos* 21: 299-325.

Christie, K.S., Lindberg, M.S., Ruess, R.W., Schmutz, J.A. 2014. Spatio-temporal patterns of ptarmigan occupancy relative to shrub cover in the Arctic. *Polar Biol*, DOI 10.1007/s00300-014-1504-z

- Cotter, R.C., Boag, D.A., Shank, C.C. 1992. Raptor predation on rock ptarmigan (*Lagopus mutus*) in the central Canadian Arctic. *J Raptor Res* 26: 146-151.
- Ehrich, D., Cerezo, M., Rodnikova, A.Y., Sokolova, N.A., Fuglei, E., Shtro, V.G., Sokolov, A.A. 2017. Vole abundance and reindeer carcasses determine breeding activity of Arctic foxes in low Arctic Yamal, Russia. *BMC Ecol* 17: 32.
- Hannon, S.J., Barry, T.W. 1986. Demography, Breeding Biology and Predation of Willow Ptarmigan at Anderson River Delta, Northwest Territories. *Arctic* 4: 300-303.
- Hansen, J., Meltofte, H., Høye, T.T. 2008. Population fluctuations in Rock Ptarmigan in high-arctic Greenland. *Dansk Ornithologisk Forenings Tidsskrift*, 102: 319-324.
- Höglund, N., Nilsson, G., Stålfelt, F. 1967. Analysis of a technique for estimating willow grouse (*Lagopus lagopus*) density. *Proceedings of the VIII International Congress of Game Biology, Helsinki*: 156-159.
- Isaev, A.P. 2016. Tetraonid birds of Yakutia. Novosibirsk; Nauka, 343 p.
- Kishchinskiy, A.A. 1973. Surveys of birds from aircraft. *Proceedings of the Oka state reserve* 9: 197-235.
- Martin, K., Doyle, C., Hannon, S., Mueller, F. 2001. Forest Grouse and Ptarmigan. In *Ecosystem Dynamics of the Boreal Forest. The Kluane Project*, eds C.J. Krebs, S. Boutin, R. Boonstra, 240-257. Oxford Univ. Press.
- McIntyre, C.L., Schmidt, J.H. Ecological and environmental correlates of territory occupancy and breeding performance of migratory Golden Eagles *Aquila chrysaetos* in interior Alaska. *IBIS* 154: 124-135.
- Meltofte, H., Sittler, B., Hansen, J. 2007. Breeding performance of tundra birds in High Arctic Northeast Greenland 1987-2007. *Arctic Birds* No. 9: 45-53.
- Mineev, O.Yu., Mineev, Yu.N. 2017. Population changes and distribution of the willow grouse in east-European tundra of Russia. *Bulletin of Moscow Society of Naturalists. Biological series*. Moscow, 2017. V 122. Issue. 4. In Russian with English summary.

- Nielsen, Ó.K., Brynjarsdóttir, J., Magnússon, K. 2004. Vöktun rjúpnastofnsins 1999-2003. Fjölrit Náttúrufræðistofnunar 47. 110 pp. [Monitoring of the ptarmigan population in Iceland 1999-2003] in Icelandic and with English summary. [http://utgafa.ni.is/fjolrit/Fjolrit\\_47.pdf](http://utgafa.ni.is/fjolrit/Fjolrit_47.pdf).
- Nilsen, E.B., Vang, R., Breisjøberget, J.I. 2018a. Tetraonid line transect surveys from Norway: Data from Statskog. Norwegian Institute for Nature Research. Sampling event dataset <https://doi.org/10.15468/q2ehlk>
- Nilsen, E.B., Vang, R., Asbjørnsen, E. 2018b. Tetraonid line transect surveys from Norway: Data from Finnmarkseiendommen (FeFo). Version 1.2. Norwegian Institute for Nature Research. Sampling event dataset <https://doi.org/10.15468/s7c8qd>
- Sdobnikov, V.M. 1938. Methods of field-biology surveying in the Arctic. *Proceedings of the research Institute of polar agriculture, animal husbandry and commercial management*. Series "Commercial economy". L. Issue. 3. 36 p.
- Unander, S., Steen, J.B. 1985. Behaviour and social structure in Svalbard Rock Ptarmigan *Lagopus mutus hyperboreus*. *Ornis Scand.* 16: 198-204.
- Uspenskiy, S.M. 1960. Quantitative account of terrestrial birds in tundra. *Ornitologiya* 3: 444-450.
